# Supplementary material
Source: publisher figshare collection journal article supplement (https://tandf.figshare.com/articles/dataset/_/7642232)
Supplement: Supplementary file 1 [file 1]

### **Supplementary materials**

Sound 1: “da.wav” – standard and deviant sound [da], phonemic condition

Sound 2: “ta.wav” – standard and deviant sound [ta], phonemic condition

Sound 3: “ad.wav” – standard and deviant sound [ad], allophonic condition

Sound 4: “at.wav” – standard and deviant sound [at], allophonic condition

Sound 5: “mmn\_dev\_da.wav” – excerpt of multifeature MMN paradigm with [da] as the target deviant

Sound 6: “mmn\_dev\_ta.wav” – excerpt of multifeature MMN paradigm with [ta] as the target deviant

Sound 7: “mmn\_dev\_ad.wav” – excerpt of multifeature MMN paradigm with [ad] as the target deviant

Sound 8: “mmn\_dev\_at.wav” – excerpt of multifeature MMN paradigm with [at] as the target deviant

**Tab. S1**

| Contrast                | Cluster-level    |                  |       | Peak-level       |                  |        |       | Coordinates |
|-------------------------|------------------|------------------|-------|------------------|------------------|--------|-------|-------------|
|                         | $p_{\text{FWE}}$ | $p_{\text{UNC}}$ | $k$   | $p_{\text{FWE}}$ | $p_{\text{UNC}}$ | $F$    | $Z$   |             |
| Phonemic<br>[dæ]-[dæ]   | < 0.001          | < 0.001          | 34610 | 0.012            | < 0.001          | 56.410 | 4.710 | -40 -27 365 |
|                         | 0.003            | 0.002            | 15745 | 0.060            | < 0.001          | 39.650 | 4.250 | 49 -30 323  |
|                         |                  |                  |       | 0.349            | < 0.001          | 24.500 | 3.620 | 28 -25 290  |
|                         | 0.057            | 0.035            | 6050  | 0.279            | < 0.001          | 26.370 | 3.720 | -30 -22 216 |
|                         |                  |                  |       | 0.385            | < 0.001          | 23.660 | 3.580 | -45 -46 183 |
|                         |                  |                  |       | 0.447            | < 0.001          | 22.370 | 3.510 | -21 -22 179 |
| Phonemic<br>[tæ]-[tæ]   | < 0.001          | < 0.001          | 26793 | 0.108            | < 0.001          | 33.380 | 4.030 | -15 -52 122 |
|                         | 0.041            | 0.028            | 7581  | 0.151            | < 0.001          | 30.540 | 3.910 | 45 -27 141  |
|                         | 0.037            | 0.025            | 7973  | 0.239            | < 0.001          | 26.770 | 3.740 | -23 45 132  |
|                         |                  |                  |       | 0.475            | < 0.001          | 21.060 | 3.430 | -40 40 97   |
|                         |                  |                  |       | 0.502            | < 0.001          | 20.570 | 3.400 | -21 32 164  |
| Allophonic<br>[æd]-[æd] | <i>n.s.</i>      |                  |       |                  |                  |        |       |             |
| Allophonic<br>[æt]-[æt] | 0.001            | 0.001            | 19796 | 0.012            | < 0.001          | 56.330 | 4.710 | 23 -22 167  |
|                         |                  |                  |       | 0.025            | < 0.001          | 47.970 | 4.500 | 34 -22 106  |
|                         | 0.002            | 0.001            | 18781 | 0.097            | < 0.001          | 35.030 | 4.090 | -23 -25 106 |
|                         |                  |                  |       | 0.378            | < 0.001          | 23.630 | 3.580 | -23 -19 147 |

**Table S1.** Results of the SPMs of the individual conditions, i.e., testing the difference waves against 0. The x, y, z coordinates refer to the 3D SPM volumes visualized in Fig. 3 (and S3) where x and y express the lateral plane (left-right) and the frontal plane (front-back) of the 64 x 64 pixel array of the sensors, respectively, and z express the temporal dimension (0-400 ms).

**Tab. S2**

| Contrast                                                      | Cluster-level    |                  |       | Peak-level       |                  |        |       | Coordinates |
|---------------------------------------------------------------|------------------|------------------|-------|------------------|------------------|--------|-------|-------------|
|                                                               | $p_{\text{FWE}}$ | $p_{\text{UNC}}$ | $k$   | $p_{\text{FWE}}$ | $p_{\text{UNC}}$ | $F$    | $Z$   |             |
| Main effect of<br><b>Context</b>                              |                  |                  |       |                  | <i>n.s.</i>      |        |       |             |
| Main effect of<br><b>Phoneme</b>                              | 0.001            | 0.001            | 25918 | 0.005            | < 0.001          | 31.460 | 4.760 | -28 -54 121 |
|                                                               |                  |                  |       | 0.044            | < 0.001          | 23.250 | 4.180 | -19 -22 141 |
|                                                               | 0.004            | 0.003            | 18410 | 0.014            | < 0.001          | 27.420 | 4.490 | -32 48 133  |
| Interaction<br>effect of<br><b>Context*</b><br><b>Phoneme</b> |                  |                  |       |                  | <i>n.s.</i>      |        |       |             |

**Table S2:** Results of the SPMs of the flexible factorial design with Context and Phoneme as factors. The x, y, z coordinates refer to the 3D SPM volumes visualized in Fig. 3 (and S3), see the caption for Table S1 for more details.

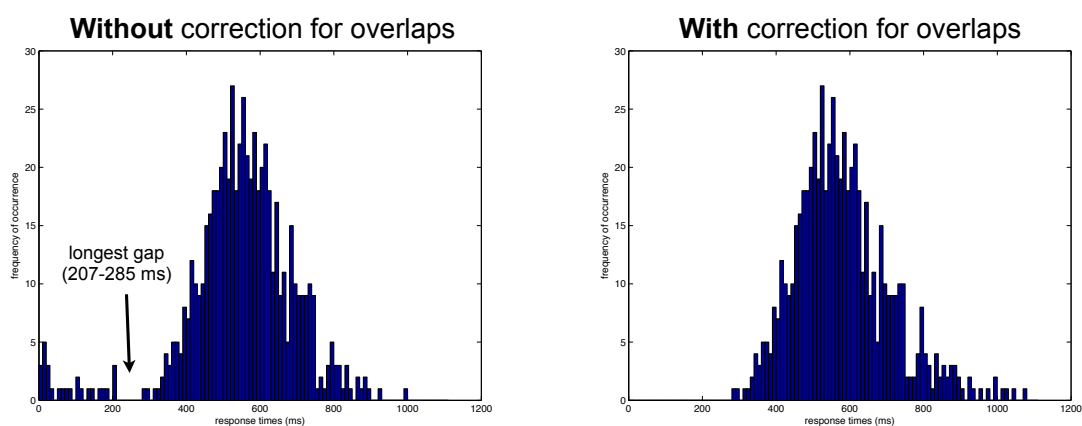

**Figure S1.** Histograms of the RTs from the behavioral paradigm.

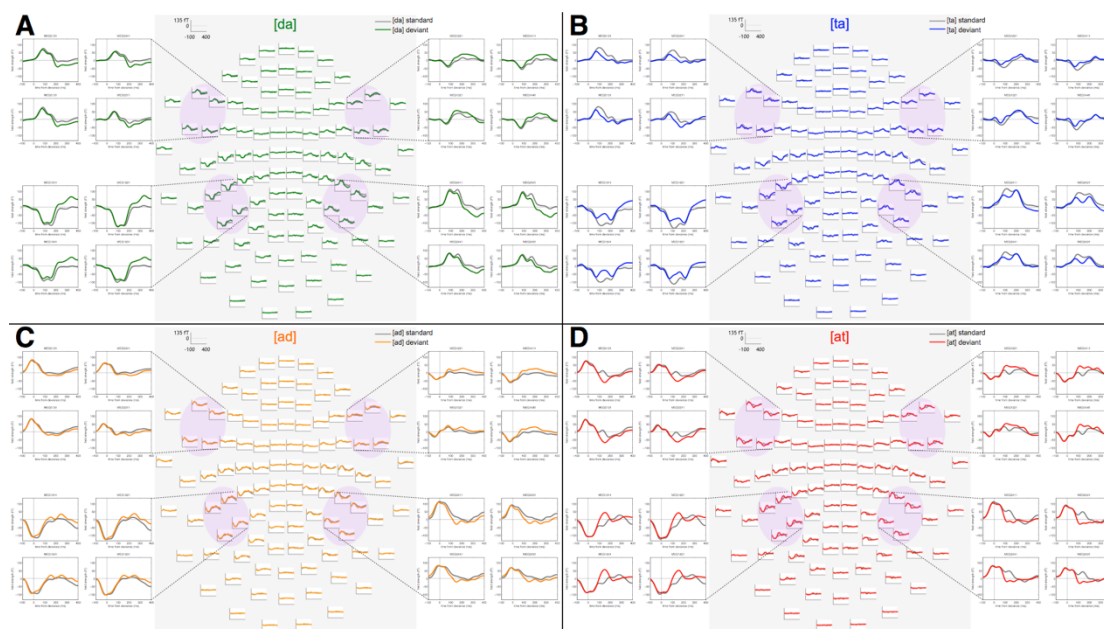

**Figure S2:** Full channel overview (of the magnetometers) for all four conditions (**A:** [da]; **B:** [ta]; **C:** [ad]; **D:** [at]). ERFs to the standard and the deviant. For each sensor site typically showing MMNm effects, four channels are highlighted: left anterior, left posterior, right anterior, and right posterior lateral sensor sites. Positive values reflect magnetic flux out of the scalp while negative values reflect magnetic flux into the scalp. Low-pass-filtered at 15 Hz for illustrative purposes.

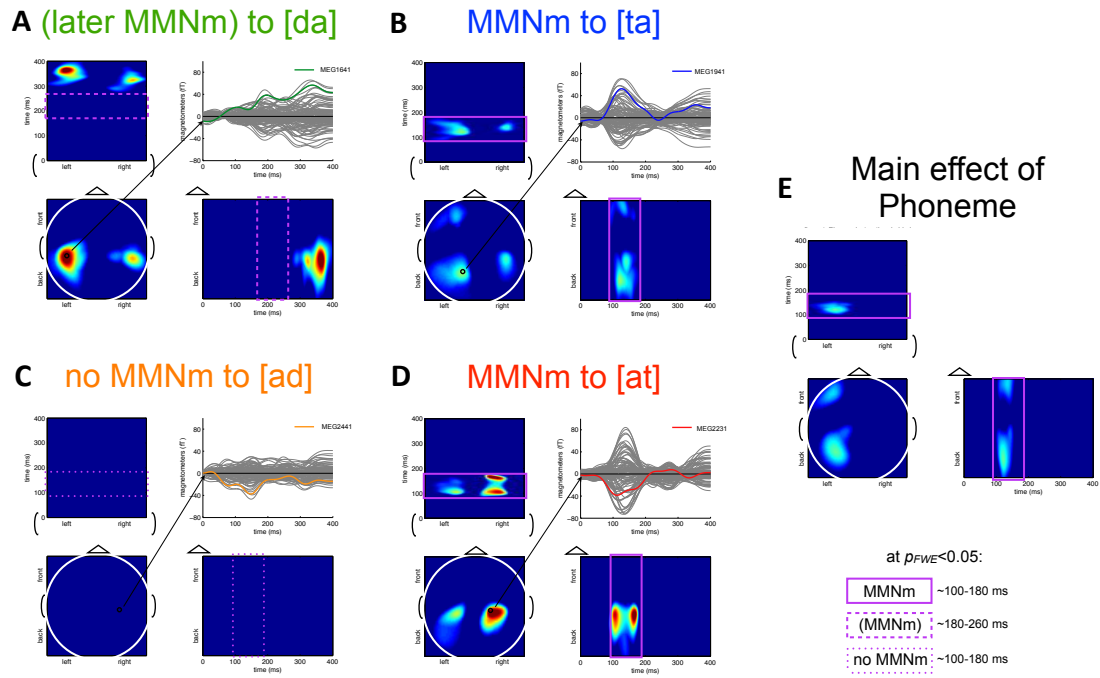

**Figure S3.** The SPMs of the four individual conditions and the flexible factorial analysis, thresholded at  $p_{FWE} < 0.05$ . See caption to figure 3 for more details.
